# Supplementary material for: Proximal Junction Kyphosis in Adult Scoliosis: Best Postoperative Radiological Predictors—A Retrospective Cohort Study
Source: Adv Orthop. 2022 Mar 23;2022:9814416. doi: 10.1155/2022/9814416 (PMC8967590; doi:10.1155/2022/9814416)
Supplement: Supplementary Materials — Additional file 1. Microsoft Excel worksheet (.xlsx) containing data used in analysis for this study. [file 9814416.f1.xlsx]

## Sheet: Sheet1
					PREOPERATIVE							POSTOPERATIVE
	AGE IN YEARS	SEX	PI	PT	ss	ll	Tk	PJK ANGLE		FOLLOW-UP TIME IN YEARS	PI	PT	SS	ll	TK	PJK ANGLE	location of IUV	GSA	LL+TK	apex of ll	THEORETICAL TK	THEORETICAL LL	PJK ANGLE AT FINAL FOLLOW-UP	OCCURRENCE OF PJK AT FINAL FOLLOW-UP	level of instrumentation	number of fusion
	56	F	52	17	39	-42	38	5.1		3	52	14	41	-50	41.5	6.7	T10	43.5	-8.5	l4	50.8	-58.54	7.3	NO	T10-L5	7
	62	F	49	28	19	-34	46.9	4.1		2	49	22	25.6	-39.5	50.2	6	T10	59.7	10.7	L4	50.35	-56.53	6.9	NO	T10-L4	8
	67	F	38	3.6	30	-24	35	3.9		1	38	3.6	32.9	-33	39.1	7.7	T2	44.1	6.1	L2-L3 disc	48.7	-49.16	19.5	YES	T2-L4	13
	50	F	77.6	18	50	-58	32	4.7		2.5	77.6	12.8	50.5	-75.2	51	5.8	T3	53.4	-24.2	L3	54.64	-75.692	6.4	NO	T3-S1	14
	65	F	55.2	34	28.9	-29	43.9	4.5		1	55.2	28.4	34.6	-59.8	52	8.5	T4	47.4	-7.8	L2-L3 disc	51.28	-60.684	18.9	YES	T4-L4	11
	51	F	56	23	41	-31	44	3.9		3	56	17.1	45	-59.3	53	5.9	T1	49.7	-6.3	L3	51.4	-61.22	6.8	NO	T1-L4	13
	60	F	81.5	20	52	-63	34	5.3		4	81.5	17.2	55.3	-76	53	7	T8	58.5	-23	L3-L4 disc	55.225	-78.305	7.9	NO	T8-L5	8
	57	F	50.7	34	20.1	-31	45	3.9		1	50.7	27.7	28.3	-36	47.8	6.9	T6	62.5	11.8	l4	50.605	-57.669	17.4	YES	T6-L5	10
	49	F	35.3	4.6	18	-34.2	39	4		2	35.3	2	22.2	-50	-49	5.9	T3	-63.7	-99	L4	48.295	-47.351	6.2	NO	T3-L5	12
	53	F	66	21	30	-54	28	4.3		3	66	16	35.5	-56	34	5.6	T4	44	-22	L3-L4 disc	52.9	-67.92	6.6	NO	T4-L5	13
	60	F	29.8	19.7	20	-41	40	3.5		1.5	29.8	14.2	24.9	-44.3	42	4.1	T10	27.5	-2.3	L4	47.47	-43.666	5.2	NO	T10-L5	7
	58	F	44.5	30	44	-59	41	5.2		1	44.5	23.9	48.1	-63.2	44.6	7	T3	25.9	-18.6	L4	49.675	-53.515	8.3	NO	T3-L5	12
	61	M	50	32.6	28	-40	31	2.5		1.5	50	28	32.1	-56	52	6.9	T5	46	-4	L3	50.5	-57.2	18	YES	T5-L5	10
	61	F	55	29	34	-38	44.5	2.6		2	55	34.4	39	-43.2	48	4.2	T2	59.8	4.8	L3	51.25	-60.55	5.7	NO	T2-L5	13
	55	F	72	30	45	-40	51	4.7		1	72	24.3	47.8	-46.7	48.5	6	T3	73.8	1.8	L3-L4 disc	53.8	-71.94	5.9	NO	T3-S1	14
	70	F	78	18	50	-48	26.1	5		2	78	14.7	51	-74	50	5.9	T3	54	-24	L3	54.7	-75.96	6.8	NO	T3-L5	13
	58	F	90.6	20	41.3	-59	32	4		3	90.6	17.1	44.1	-78.4	54	5.8	T4	66.2	-24.4	L3-L4 disc	56.59	-84.402	7.4	NO	T3-L5	13
	71	F	40	27.3	30	-33	63	2.5		1	40	22	34.9	-38.9	61	5.2	T3	62.1	22.1	L2-L3 disc	49	-50.5	16.4	YES	T3-L4	12
	58	F	37	18	17.4	-29	84	3.1		2	37	13.5	22.6	-48.9	47.5	4.1	T10	35.6	-1.4	L3	48.55	-48.49	15.2	YES	T10-L5	8
	50	F	54	20.7	28	-41	44	3.2		3	54	15	33	-45	48	5	T1	57	3	L3	51.1	-59.88	5.8		T1-L4	13
	63	F	44.6	25	31	-42	32	2.9		1	44.6	20.1	36	-47.4	37	7.8	T2	34.2	-10.4	L2-L3 disc	49.69	-53.582	18.5	YES	T2-L4	10
	61	F	56	25	40	-43	48	4.3		4	56	19	45.2	-50.1	52	4.8	T4	57.9	1.9	L3	51.4	-61.22	5.3	NO	T4-L5	8
	73	F	51	27.2	35	-39	30	2.8		2	51	22.3	39.9	-56	49	4	T4	44	-7	L2-L3 disc	50.65	-57.87	4	NO	T5-L4	6
	57	F	39	7.5	15	-23	73.6	3.5		2	39	4.5	21	-50.3	47.8	3.8	T1	36.5	-2.5	L3	48.85	-49.83	4.6	NO	T1-L5	10
	65	M	49	19	31	-45	33	3.6		3	49	15.1	35.7	-53	39	5	T1	35	-14	L3-L4 disc	50.35	-56.53	5.7	NO	T1-L5	11
	62	F	53.2	20	39	-38	30	3.8		1	53.2	14.9	42	-46.2	39.5	4.9	T2	46.5	-6.7	L3-L4 disc	50.98	-59.344	17	YES	T2-L5	12
	58	F	36.9	3.3	17	-13	63	3.3		1	36.9	3	23	-49.1	48.3	5.1	T4	36.1	-0.8	L4	48.535	-48.423	16.5	YES	T4-S1	11
	57	F	62	27	49	-54	27	2.7		2	62	21.9	50.3	-60	35	3.7	T1	37	-25	L2-L3 disc	52.3	-65.24	4.9	NO	T1-L4	12
	63	F	48	21	23.6	-30	31	7.1		3	48	16.8	27	-56	52	8.1	T4	44	-4	L3	50.2	-55.86	9.3	NO	T4-L4	10
	65	F	67	19.5	36	-47	38	3.2		2	67	15	40	-66	52.8	4	T2	53.8	-13.2	L4	53.05	-68.59	5.2	NO	T2-L5	10
	69	M	55	26	19	-31	34	4		1.5	55	21	24	-36	38.3	7.3	T6	57.3	2.3	L2-L3 disc	51.25	-60.55	18.6	YES	T6-L4	7
	51	F	60	24	33.8	-58	33	4		2	60	18.3	37.1	-65	49.6	5.7	T1	44.6	-15.4	L2	52	-63.9	6.2	NO	T1-L4	12
	59	F	60	30	31.9	-39	36	6		2	60	26.7	36.8	-46.7	41.1	7	T6	54.4	-5.6	L4	52	-63.9	8	NO	T6-L5	8
	60	F	53	27.8	25	-37	60	4.5		3	53	24.6	29.9	-60	48	6.2	T4	41	-12	L3-L4 disc	50.95	-59.21	7	NO	T4-L5	9
	65	F	44.2	15	21	-29	42	8.2		2	44.2	13.1	24.2	-54	49	9.1	T3	39.2	-5	L3	49.63	-53.314	9.7	NO	T3-L4	10
	70	F	30.8	11.6	15.2	-39	44	2		1	30.8	10	20.8	-43	50.1	3.8	T4	37.9	7.1	L2-L3 disc	47.62	-44.336	3.9	NO	T4-L4	9
	71	F	59	39	30	-50	21.6	4.9		2	59	34.6	32.8	-63	50.8	6	T4	46.8	-12.2	L4	51.85	-63.23	8.1	NO	T4-L5	10
	54	F	39	23.9	16	-38.6	37	5		2	39	20.9	19.9	-44	45	6.7	T3	40	1	L3	48.85	-49.83	7.3	NO	T3-L4	11
	60	F	38	37	20	-40	47	4.1		3	38	33.1	24	-44.8	53	4.9	T5	46.2	8.2	L3-L4 disc	48.7	-49.16	6	NO	T5-L5	8
	58	F	80	31	28.5	-39	32.1	2.9		3	80	28	30.4	-76.4	54.5	4.9	T2	58.1	-21.9	L3-L2 disc	55	-77.3	16.2	YES	T2-L4	11
	59	F	54	20	27	-41	31	6.3		3	54	19	29.1	-46	35.9	8	T8	43.9	-10.1	L3-L4 disc	51.1	-59.88	8.7	NO	T8-L5	7
	51	F	67	29	26	-35	47	5.4		2.5	67	27.1	28.6	-68	52.6	5.9	T4	51.6	-15.4	L3	53.05	-68.59	7.1	NO	T4-L4	9
	64	F	76	18	48	-57	33	4.6		1	76	15.1	50	-62.5	38	8.1	T2	51.5	-24.5	L2-L3 disc	54.4	-74.62	18.9	YES	T2-L5	12
	68	F	45.3	37.9	17.1	-36	47	6		2	45.3	33.6	22	-41	51	7.1	T8	55.3	10	L4	49.795	-54.051	7.3	NO	T8-L5	7
	59	F	59	24	33	-39	41	3.7		0.5	59	21.4	35.3	-62.2	50	6.3	T1	46.8	-12.2	L2-L3 disc	51.85	-63.23	17.5	YES	T1-L4	9
	67	F	55.7	26	28	-40	17.6	4.6		2	55.7	23.3	31	-45	26.8	6.7	T9	37.5	-18.2	L3-L4 disc	51.355	-61.019	7.3	NO	T9-L5	7
	65	F	41.2	17	15	-37.5	42	5		3	41.2	14.2	18.8	-46	47	6.8	L1	42.2	1	L4	49.18	-51.304	7.5	NO	L1-S1	5
	73	F	77	21.8	40	-55	37	2.1		1	77	16.1	43.7	-60	41	5	T9	58	-19	L3	54.55	-75.29	15.4	YES	T9-L4	6
	69	F	51.3	19	17.7	-38	38	3.1		2	51.3	17	20	-57	51.9	4.8	T6	46.2	-5.1	L3-L4 disc	50.695	-58.071	5.2	NO	T6-L5	7
	62	F	61	23	34	-69	27	7		2	61	21.8	36.8	-71.2	32	8.8	T2	21.8	-39.2	L2-L3 disc	52.15	-64.57	9.2	NO	T2-L4	11
	68	F	55	19	28	-47.1	35	3.5		1.5	55	15	31	-56.8	38.9	6.2	T6	37.1	-17.9	L3-L4 disc	51.25	-60.55	6.5	NO	T6-L5	8
	57	F	61	32	23	-48	37	6.9		3	61	28	25.2	-65	51	7.9	T6	47	-14	L3-L4 disc	52.15	-64.57	8.5	NO	T6-L5	7
